# Supplementary material for: Hydrophobic-barrier-assisted formation of vertically layered capacitive electrodes within a single sheet of paper
Source: Royal Society of Chemistry journal article supplement (doi:10.1039/d1ta08854h), 2021-01-01
Supplement: d1ta08854h1.pdf [file d1ta08854h1.pdf]

## Supplementary Information

### Hydrophobic-Barrier-Assisted Formation of Vertically Layered Capacitive Electrodes within a Single Sheet of Paper

In Hyeok Oh,<sup>a</sup> Sung Min Lee,<sup>a</sup> Yeon Woo Kim,<sup>a</sup> Seyoung Choi,<sup>b</sup> Inho Nam,<sup>\*abc</sup> and Suk Tai Chang<sup>\*a</sup>

<sup>a</sup> School of Chemical Engineering and Materials Science, Chung-Ang University, 84 Heukseok-ro, Dongjak-gu, Seoul 06974, Republic of Korea

<sup>b</sup> Department of Intelligent Energy and Industry, Chung-Ang-University, 84 Heukseok-ro, Dongjak-gu, Seoul 06974, Republic of Korea

<sup>c</sup> Department of Advanced Materials Engineering, Chung-Ang University, 4726 Seodong-daero, Daedeok-myeon, Anseong-si, Gyeonggi-do 17546, Republic of Korea

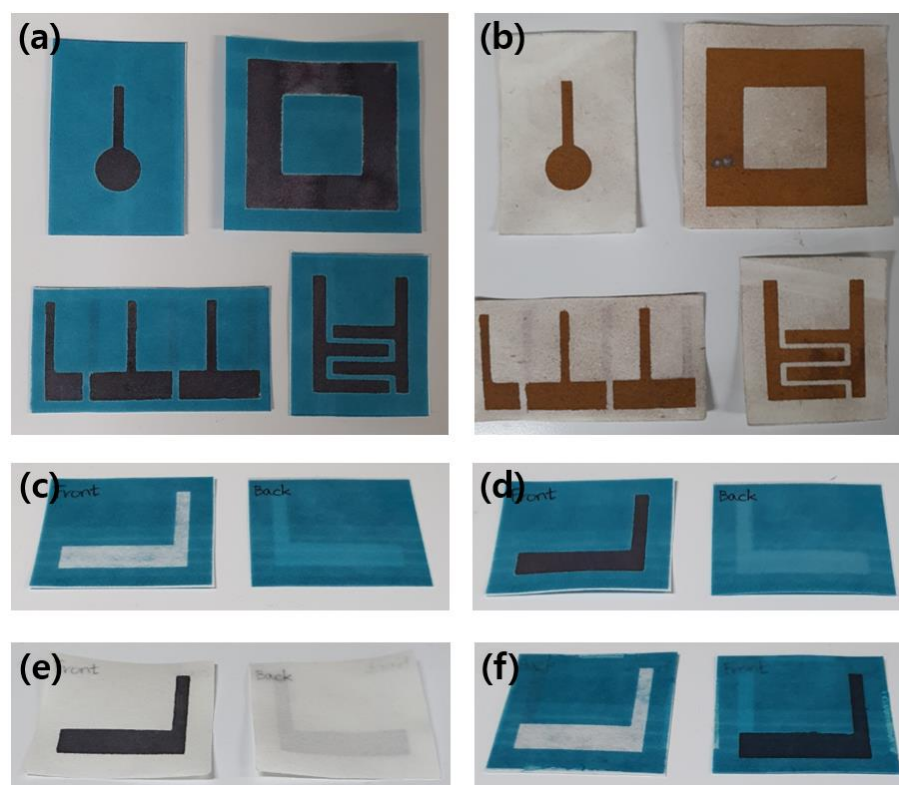

**Figure S1.** Photographs of various wax-patterned papers. (a) AuNPs deposited in the non-hydrophobic channel spaces. (b) Various patterned Au-paper electrodes. (c) Formation of hydrophobic channels inside the paper. (d) AuNP deposition in a hydrophilic channel within a single sheet of paper. (e) After wax removal. (f) AuNP-paper covered with solid wax.

\* Corresponding author. E-mail : stchang@cau.ac.kr (S. T. Chang), inhonam@cau.ac.kr (I. Nam)

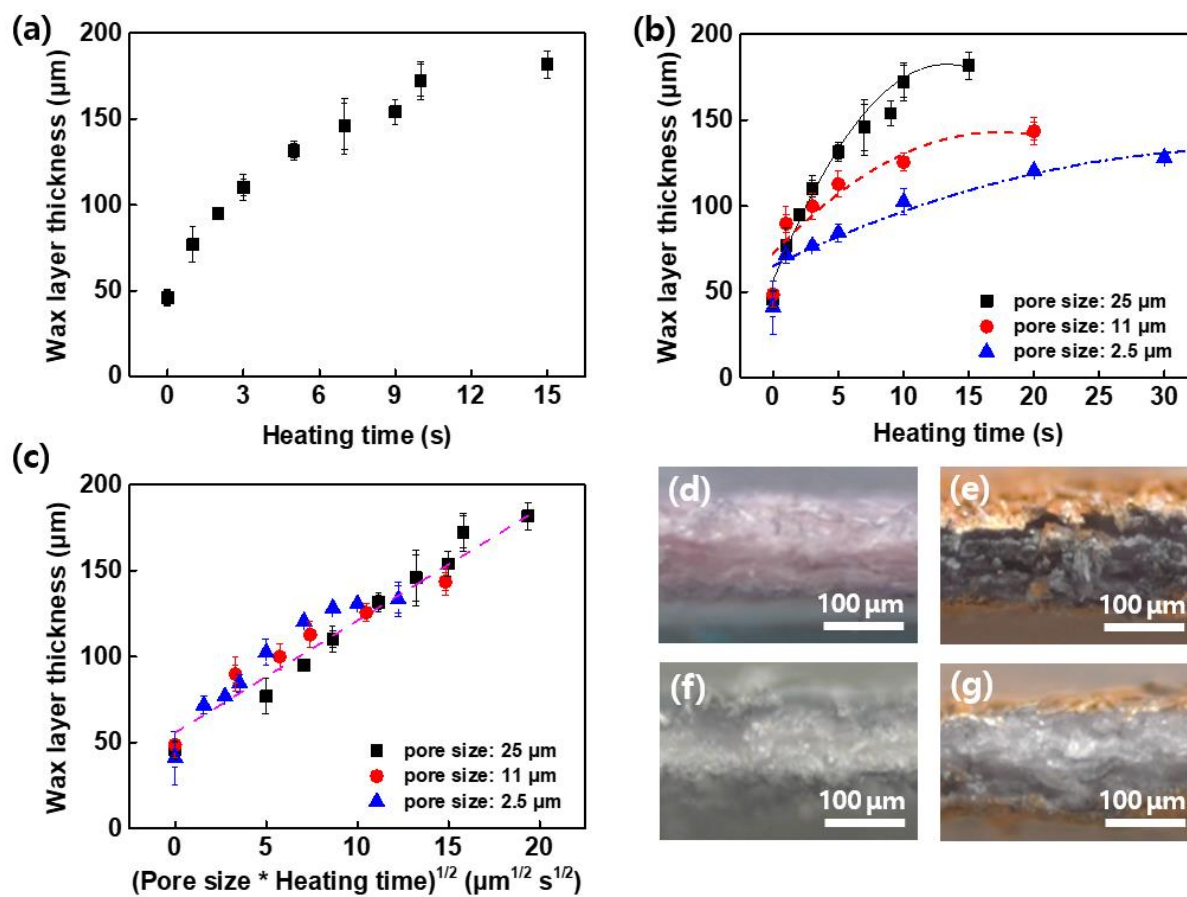

**Figure S2.** Solid wax characteristics. (a) The thickness of permeated solid wax as a function of heating time. (b) Thickness of permeated wax as a function of heating time for different paper pore sizes. (c) The thickness of permeated wax as a function of the square root of the pore size multiplied by the square root of the heating time. Cross-sectional optical micrographs of AuNPs and the Au-deposited paper (d, e) without wax and (f, g) with wax heated for 3 s.

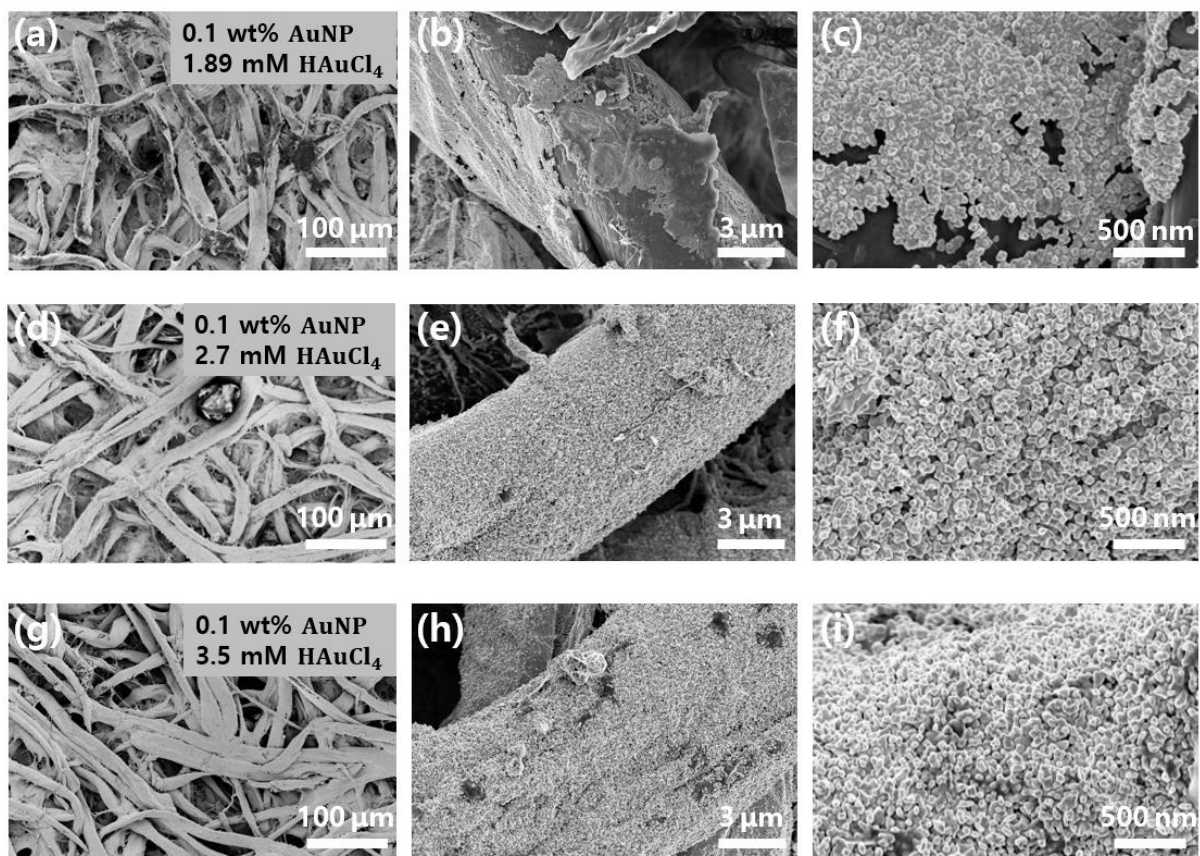

**Figure S3.** FE-SEM images of the Au-paper electrodes fabricated with 0.1 wt% AuNPs and (a–c) 1.89, (d–f) 2.7, and (g–i) 3.5 mM H<sub>AuCl</sub><sub>4</sub>.

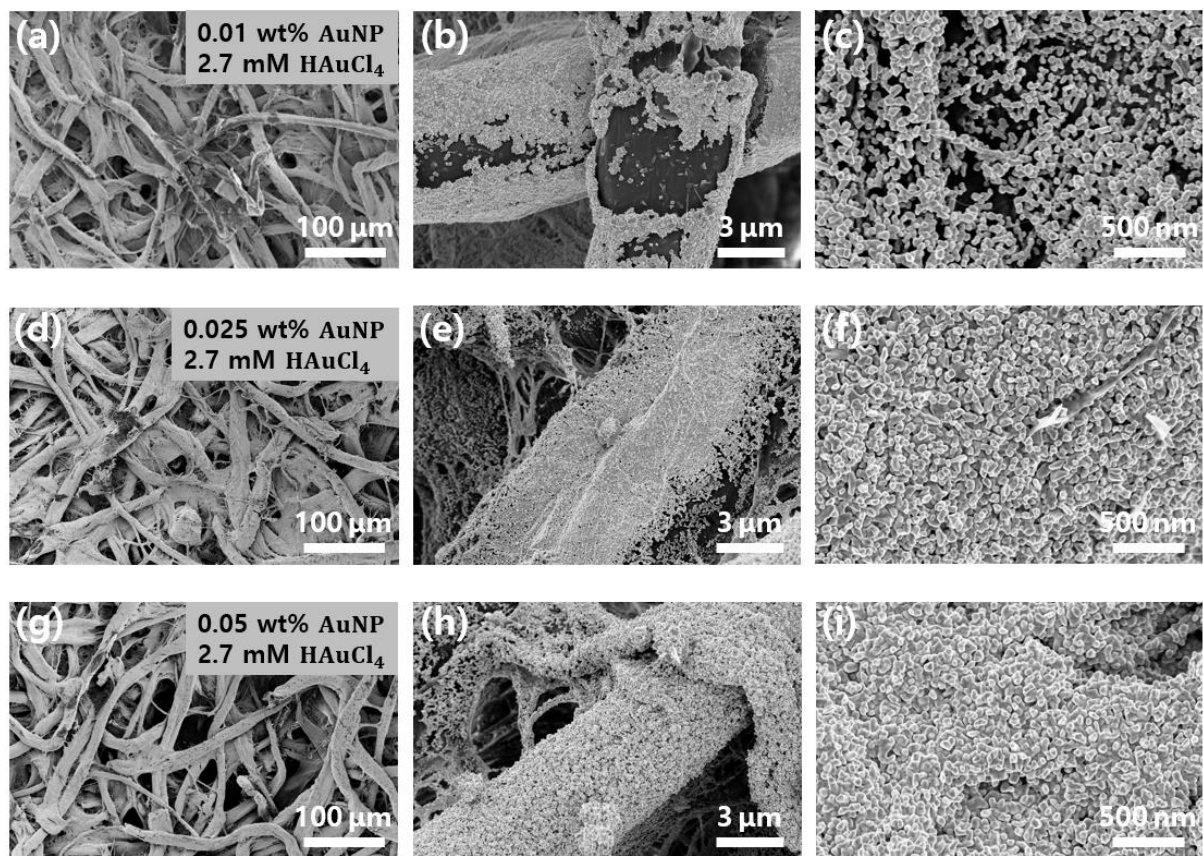

**Figure S4.** FE-SEM images of the Au-paper electrodes fabricated with 2.7 mM H<sub>AuCl</sub><sub>4</sub> and (a–c) 0.01, (d–f) 0.025, and (g–i) 0.05 wt% AuNPs.

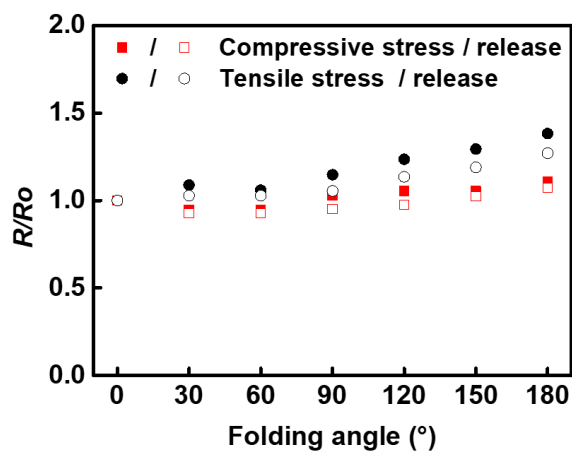

Figure S5. Resistance profiles from the folding test and resistance recovery on release.

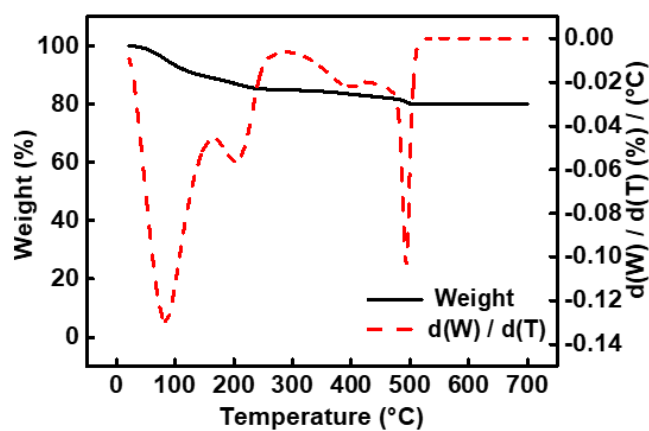

Figure S6. TGA of the MnO<sub>2</sub>-Au-paper.

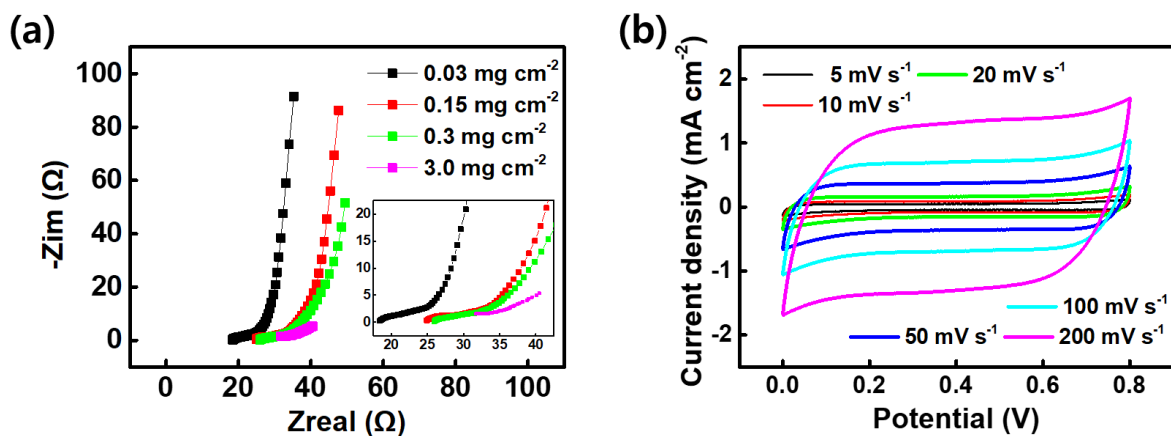

**Figure S7.** (a) Nyquist plots of the MnO<sub>2</sub>-Au-paper electrodes with different amounts of MnO<sub>2</sub>. (b) CVs at different scan rates of the MnO<sub>2</sub>-Au-paper electrodes with a mass loading of 0.03 mg cm<sup>-2</sup>.

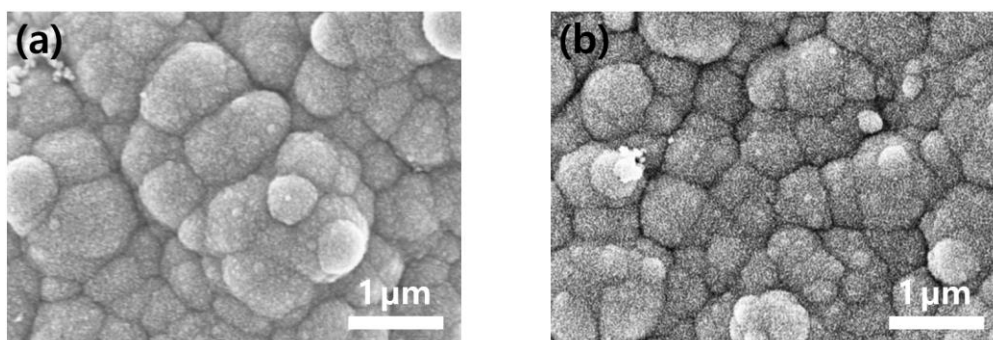

**Figure S8.** (a) FE-SEM image of the MnO<sub>2</sub>-Au-paper electrode with the mass loading of 0.3 mg cm<sup>-2</sup>. (b) The electrode after 5000 charge/discharge cycles.

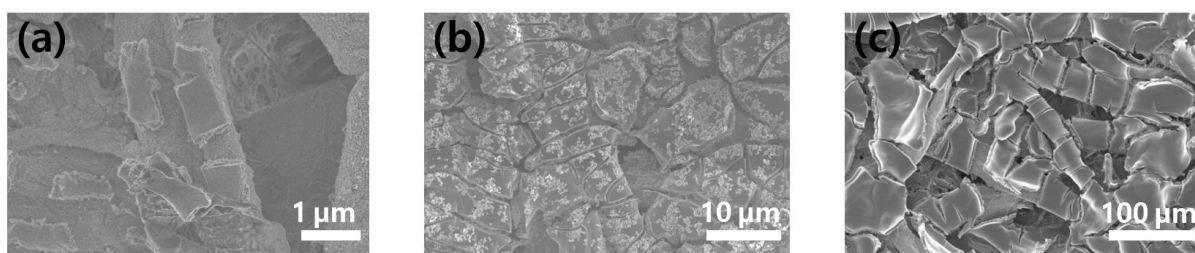

**Figure S9.** FE-SEM images of the MnO<sub>2</sub>-Au-paper electrodes with mass loading of (a) 1.5, (b) 3.0, and (c) 4.0 mg cm<sup>-2</sup>.



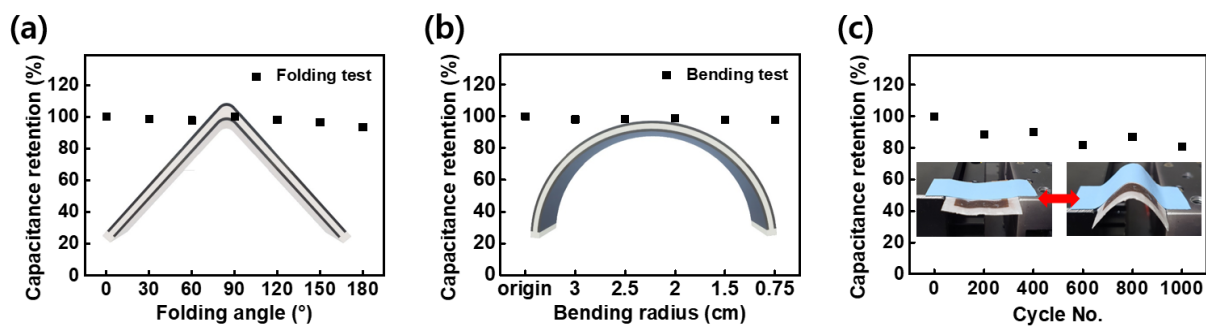

**Figure S10.** Change in capacitance retention with (a) folding angle and (b) bending radius. (c) Capacitance stability over 1000 cycles with a bending radius of 2.0 cm.

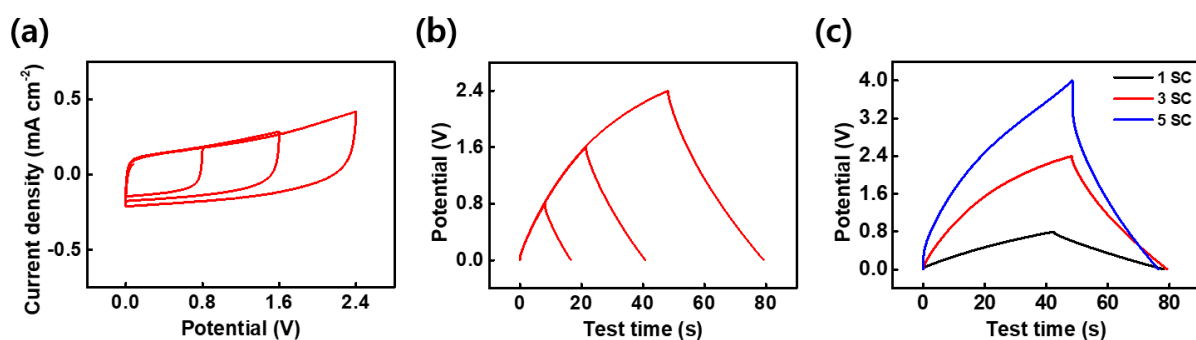

**Figure S11.** (a) CVs and (b) GCDs of the three-series supercapacitor in different potential ranges. (c) GCD curves at  $0.3 \text{ mA cm}^{-2}$  of the single, three-series, and five-series supercapacitors.
